# Supplementary material
Source: publisher site journal article supplement (https://www.spandidos-publications.com/6276/downloadSupplementary)
Supplement: Supplementary file 1 [file downloadSupplementary]

## Sheet: Sheet1
Table SI. Sequences of reverse transcription-quantitative PCR Primers.
	mRNA primers
Gene name	Species	Direction	Sequence (5'-3')
RLP9	Human	FORWARD	CAAATGGTGGGGTAACAGAAAG
		REVERSE	AGTGTAACACCCTTGATCATGT
GAPDH	Human	FORWARD	GGAGCGAGATCCCTCCAAAAT
		REVERSE	GGCTGTTGTCATACTTCTCATGG
CBS	Human	FORWARD	GGCCAAGTGTGAGTTCTTCAA
		REVERSE	GGCTCGATAATCGTGTCCCC
	miRNA primers (Tailing Reaction)
Name	Species	Direction	Sequence (5'-3')
hsa-miR-1307-3p	Human	FORWARD	TATATACTCGGCGTGGCGTCG
hsa-miR-1180-5p	Human	FORWARD	TATATATAGGACCCACCCGGCCG
hsa-miR-24-3p	Human	FORWARD	TGGCTCAGTTCAGCAGGAACAG
hsa-miR-4674	Human	FORWARD	TATATATACTGGGCTCGGGACGCG
hsa-miR-7852-3p	Human	FORWARD	CGCGCTATGTAGTAGTCAAAGGCATTT
hsa-miR-6807-5p	Human	FORWARD	GTGAGCCAGTGGAATGGAGAGG
has-miR-3121-3p	Human	FORWARD	CCGCGTAAATAGAGTAGGCAAAGGACA
has-miR-99b-5p	Human	FORWARD	TATACACCCGTAGAACCGACCTTGC
has-miR-5195-3p	Human	FORWARD	ATCCAGTTCTCTGAGGGGGCT
has-miR-3180-3p	Human	FORWARD	TATATATATGGGGCGGAGCTTCCGG
has-miR-8063	Human	FORWARD	CTCAAAATCAGGAGTCGGGGCTT
has-miR-185-5p	Human	FORWARD	TCTGGAGAGAAAGGCAGTTCCTGA
has-miR-4508	Human	FORWARD	TATATATATAGCGGGGCTGGGCGC
has-miR-4530	Human	FORWARD	TATATACCCAGCAGGACGGGAGC
has-miR-548u	Human	FORWARD	GCGCAAAGACTGCAATTACTTTTGCG
has-miR-551b-5p	Human	FORWARD	GAAATCAAGCGTGGGTGAGACC
has-miR-5189-5p	Human	FORWARD	TCTGGGCACAGGCGGAT
has-miR-2113	Human	FORWARD	CGATTTGTGCTTGGCTCTGTCAC
has-miR-5100	Human	FORWARD	TATTCAGATCCCAGCGGTGCC
hsa-miR-16-5p	Human	FORWARD	ACGTAGCAGCACGTAAATATTGGCG
